# Supplementary material for: A Study on Enhancing Public Health Services for Rural Persons with Disabilities from the Perspective of the Ethical Principle of Solidarity
Source: Research Square preprint supplement (doi:10.21203/rs.3.rs-8583569/v1), 2026-02-24
Supplement: Supplementary file 1 [file 09513a680db2b153694df85e.docx]

Interview Outline for Stakeholders of Rural Persons with Disabilities of Lin’an District, Hangzhou

I. Basic Information

1. What is your date of birth?

2. What is your gender?

1. What is your educational level?
2. What is your relationship to the person with disability (hereafter referred to as “the person”)? (e.g., spouse, parent, child, relative, neighbor, friend, etc.)
3. What is the type and severity grade of the person’s disability?
4. What is the main source of livelihood for the family of the person, and do they have a stable income?

II. Instrumental Support Dimension

A. Assistive Devices and Accessibility Needs

1. What assistive devices do you think the person needs to facilitate daily life, and what difficulties does the person face in acquiring them?

1. Has the person’s family applied for home accessibility modification programs? Did the modifications meet your expectations? If not, how would you suggest improvements?

B. Medical and Rehabilitation Services Needs

1. What medical and rehabilitation services do you think the person currently needs?

2. Are you aware of special medical insurance policies for disabled individuals? Do the existing policies meet their needs?

3. What improvements would you suggest for the current medical insurance policies in terms of coverage and reimbursement rates?

C. Community Activities and Participation

1. Has the person participated in any community events or training related to disability? What specific events has he/she attended?

2. What benefits has the person gained from attending community activities or training? Can you share that experience?

III. Emotional Support Dimension

A. Family and Relatives

1. In daily life, do you frequently engage in heartfelt communications with the person? For example, how do you comfort and encourage the person when the person feels down or troubled? Can you share any memorable communication scenarios?

2. How would you describe the emotional support atmosphere within the person’s family? Is it warm and harmonious, or are there some conflicts or gaps? How does this atmosphere affect the emotional state of the person?

B. Friends and Neighbors

1. Does the person have close friends? Do they frequently spend time together? What emotional support do the friends provide?

2. How do the person’s neighbors view them? Are they friendly and helpful, or are they indifferent and distant? Can you share any specific interactions between the neighbors and the person?

3. If friends and neighbors could offer more emotional support to the person, how do you think it would positively affect the person’s life? In what areas could they provide more care and help?

C. Community Workers

1. Do community workers regularly contact the person? How do they usually communicate—through home visits, phone calls, or other means?

2. Are you aware of any emotional support services or activities that the community has provided to the person, such as psychological counseling, emotional support groups, or holiday visits? Has the person participated in any of these activities, and what was the outcome?

3. What role do you think community workers play in providing emotional support for the person? How does their involvement affect the person’s emotional state and confidence in life?

IV. Informational Support Dimension

A. Information Access

1. What health-related information would the person and the person’s family like to receive?

2. What channels do the person and the person’s family typically use to obtain health knowledge and policies? Do they rely on community publicity, notifications from the Disabled Persons’ Federation, or other sources?

B. Information Interpretation

1. Do you and the person find the health information you receive accurate and easy to understand? Are you and the person aware of national and local government policies for individuals with disabilities, such as educational subsidies or employment support?

2. In the process of applying for and receiving these policies, do you and the person feel that the information was transmitted timely and clearly? Have you and the person ever missed an opportunity due to inadequate communication?
