# Supplementary material for: A Study on Enhancing Public Health Services for Rural Persons with Disabilities from the Perspective of the Ethical Principle of Solidarity
Source: Research Square preprint supplement (doi:10.21203/rs.3.rs-8583569/v1), 2026-02-24
Supplement: Supplementary file 2 [file 39e94363a7e83cf92c6233e2.docx]

Interview Outline for Staff from the Disabled Persons’ Federation and Social Work Organizations in Lin’an District, Hangzhou

I. Basic Information

1. What is your date of birth?

2. What is your gender?

3. What is your workplace?

II. Instrumental Support Dimension

A. Assistive Devices and Accessibility Construction

1. Has a long-term plan been developed for the construction of assistive devices and accessibility facilities? What are the main goals and key directions of the plan?

2. What special challenges exist for building accessibility facilities in rural areas? What specific measures have been taken to address these challenges?

3. What is the process for providing assistive devices to individuals with disabilities? How do these processes work from application and evaluation to allocation and distribution?

4. From your observations and feedback, what practical changes have assistive devices and accessibility facilities made in the daily lives and mobility of individuals with disabilities? Can you share any successful examples?

B. Medical and Rehabilitation Services

1. What types of medical and rehabilitation services are currently provided for individuals with disabilities, such as physical therapy, occupational therapy, speech therapy, and psychological rehabilitation? How do the services differ for different types of disabilities?

2. How are medical, educational, and employment resources integrated to provide comprehensive rehabilitation services for individuals with disabilities.

C. Community Disability-Related Activities

1. What types of activities has the community organized for individuals with disabilities, such as cultural and entertainment activities (e.g., performances, handicrafts), sports and fitness activities, vocational training, volunteer services, etc.? How frequently are these activities held?

2. What is the level of participation by individuals with disabilities in community activities? What factors influence their participation, such as activity content, timing, or accessibility?

3. What positive effects have these activities had on the physical and mental health, social integration, and skill development of individuals with disabilities? Are there any activities that have received high praise and recognition from individuals with disabilities?

III. Emotional Support Dimension

1. What service philosophy and goals does the Disabled Persons’ Federation and community social workers adhere to in providing emotional support to individuals with disabilities? How do they understand the importance of emotional support?

2. In daily work, how is emotional support provided, such as through individual counseling, group activities, home visits, or phone communication? How do emotional support services vary depending on the type of disability (e.g., physical, intellectual, mental) and emotional needs (e.g., loneliness, anxiety, inferiority)?

3. How do individuals with disabilities and their families respond to emotional support services? What improvements have been made based on feedback to optimize the services?

IV. Informational Support Dimension

A. Information Dissemination

1. Through which channels do the Disabled Persons’ Federation and community social work organizations primarily disseminate information to individuals with disabilities and their families, such as official websites, WeChat accounts, community bulletin boards, text message notifications, etc.? How do the frequency and content focus of these channels differ?

2. What types of information are primarily disseminated, such as policies and regulations, rehabilitation knowledge, activity notifications, employment information, etc.? How is the accuracy and timeliness of the information ensured? In the process of information dissemination, how are the information access abilities and needs of individuals with different types of disabilities considered, ensuring that the information is accurately communicated to them? For example, providing written information for individuals with hearing impairments.

B. Information Interpretation

1. When individuals with disabilities and their stakeholders have doubts or difficulties understanding the disseminated information, is information interpretation service provided? What are the available methods for information interpretation, such as face-to-face consultation, telephone answers, online Q&A, etc.? Are the staff providing these services able to accurately and clearly address the questions posed by individuals with disabilities?

2. What role does information interpretation service play in helping individuals with disabilities and their stakeholders understand and use relevant information? Are there any cases that illustrate how information interpretation services have helped them solve practical issues?
