# Supplementary material for: A Study on Enhancing Public Health Services for Rural Persons with Disabilities from the Perspective of the Ethical Principle of Solidarity
Source: Research Square preprint supplement (doi:10.21203/rs.3.rs-8583569/v1), 2026-02-24
Supplement: Supplementary file 3 [file e32a539e2ba77a46947e1767.docx]

Interview Outline for Rural Persons with Disabilities of Lin’an District, Hangzhou

I. Basic Information

1. What is your date of birth?

2. What is your gender?

3. What is your educational level? Have you received special education for Individuals with disability?

4. What is the type and severity grade of your disability?

5. What is your main source of livelihood, and do you have a stable income?

II. Instrumental Support Dimension

A. Assistive Devices and Accessibility Needs

1. What assistive devices do you currently need to facilitate your daily life?

2. Have you encountered any difficulties in acquiring these assistive devices?

3. Which areas of your home do you think need to be remodeled for accessibility?

4. Have you applied for home accessibility modification programs? Did the modifications meet your expectations? If not, how would you like them to be improved?

B. Medical and Rehabilitation Services Needs

1. What medical and rehabilitation services do you currently need? What are your channels for accessing these services?

2. How would you rate the quality of the medical and rehabilitation services you have received? What problems have you encountered?

3. Are you aware of any special medical insurance policies for individuals with disabilities? Do the existing policies meet your needs?

4. What improvements would you suggest for the current medical insurance policies in terms of coverage and reimbursement rates?

C. Community Activities and Participation

1. Have you participated in any community events or training sessions related to disability? What specific events or training have you attended?

2. What benefits have you gained from attending these community activities or training sessions? Can you share your experience?

III. Emotional Support Dimension

A. Family and Relatives

1. When you encounter difficulties or feel down, how do your family members and relatives comfort and encourage you?

2. How would you assess the understanding and support your family members and relatives provide you? Have there been any conflicts or pressure related to your disability?

B. Friends and Neighbors

1. Do your friends and neighbors provide you with any assistance?

2. Do you feel your disability has caused any difficulties in social interactions? If so, in what ways?

C. Community Workers

3. What specific assistance do community workers provide to you?

4. What additional help or services would you like community workers to offer?

IV. Informational Support Dimension

A. Information Access

1. What health-related information would you like to receive?

2. What channels do you typically use to obtain health knowledge and policies? Do you use community bulletins, notices from the Disabled Persons’ Federation, or other sources?

B. Information Interpretation

1. Do you find the health information you receive accurate and easy to understand? Are you aware of national and local policies for people with disabilities, such as education subsidies or employment support?

2. During the application process for these policies and benefits, do you think information transmission is timely and clear? Have you ever missed out on an opportunity due to poor communication?
